# Supplementary material for: Unusual Occurrence of Two Bona-Fide CCA-Adding Enzymes in Dictyostelium discoideum
Source: PubMed Central journal article supplement (PMC7432833; doi:10.3390/ijms21155210), 2020-07-23
Supplement: ijms-21-05210-s001.pdf [file ijms-21-05210-s001.pdf]

## Supplementary Data

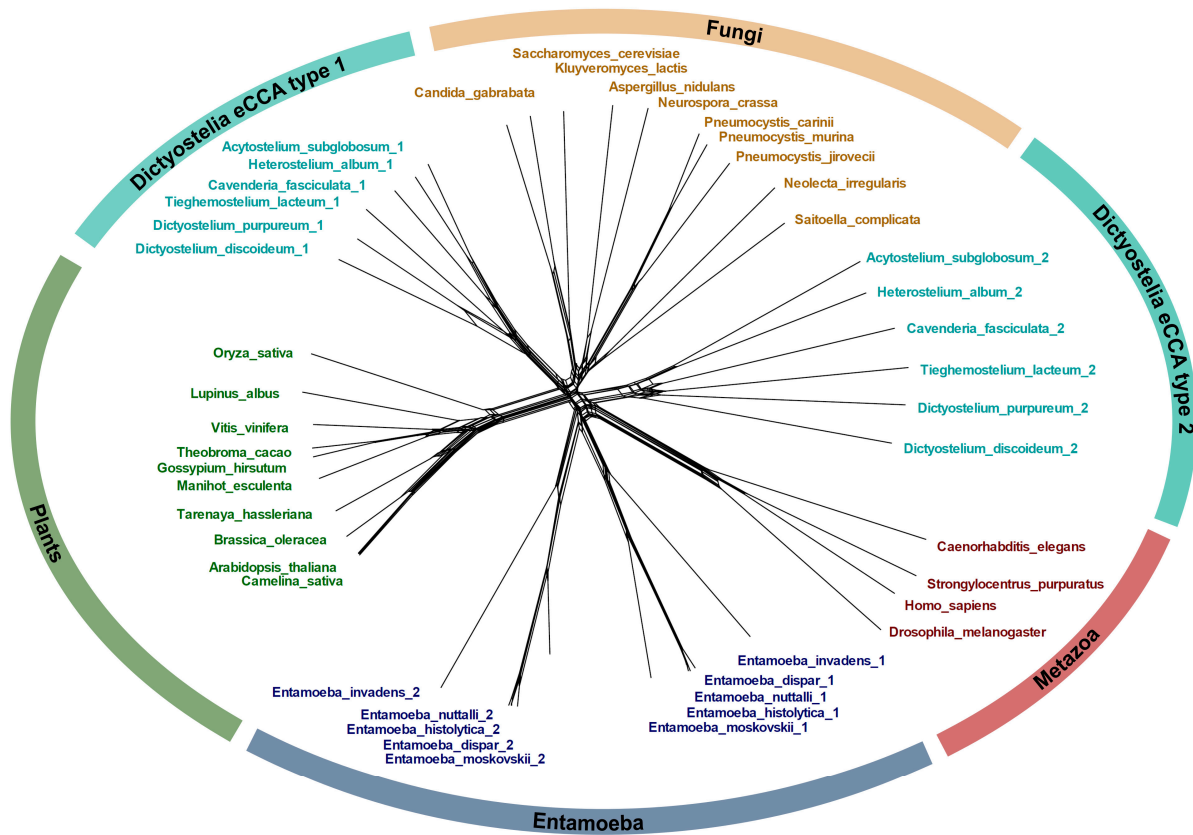

**Figure S1. Phylogenetic analysis of the two Dictyostelia CCA-adding enzyme types.** Protein sequences of Dictyostelia, Fungi, Metazoa, Plants and Entamoeba CCA-adding enzymes were aligned using Clustal Omega [1] with standard settings. The alignment was used for phylogenetic tree generation using the program SplitsTree 4 [2]. The phylogenetic tree indicates that both types of Dictyostelia CCA-adding enzymes are only distantly related because they do not share a common branch, but have separate splits. The Dictyostelia eCCA1 (ancestral eukaryotic CCA-adding enzyme type 1) enzymes branch more closely with Plants and Fungi enzymes, whereas enzymes of type 2 (eCCA2) branch more closely to the metazoan enzymes.

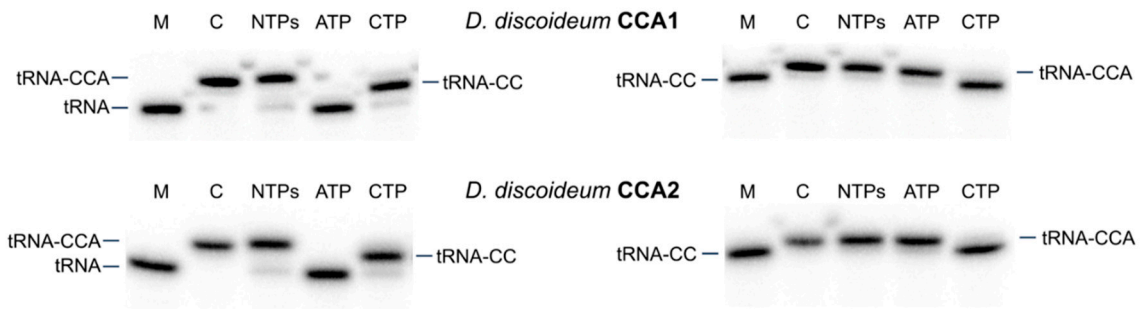

**Figure S2. Both CCA1 and CCA2 synthesize full CCA-ends.** Recombinantly expressed CCA-adding enzymes of *D. discoideum* were incubated with a  $\alpha$ -<sup>32</sup>P-labeled tRNA substrate that lacks the CCA-terminus (tRNA) and a tRNA substrate that carries a CC-end, where only the terminal A residue is missing (tRNA-CC). Left panel: In the presence of only CTP, both enzymes add two residues to the tRNA lacking the CCA-end, resulting in tRNA-CC. In contrast, ATP is not incorporated at all. The same result is observed in the presence of all four nucleotides (NTPs). Right panel: On tRNA-CC, both enzymes add a terminal A residue when ATP (or NTPs) is offered. These results prove that CCA1 as well as CCA2 are bona fide CCA-adding enzymes and do not represent tRNA nucleotidyltransferases with partial activities as found in some other organisms [3–7].

In these assays, yeast tRNA<sup>Phe</sup> was used as substrate. As the structure of this *in vitro* transcript is highly similar to that of the native and fully modified tRNA [8], it is frequently used as a standard substrate for the investigation of *in vitro* tRNA processing events [9–13]. M – mock incubation of labeled tRNA transcripts without enzyme. C, migration control consisting of labeled tRNA carrying a CCA-end.

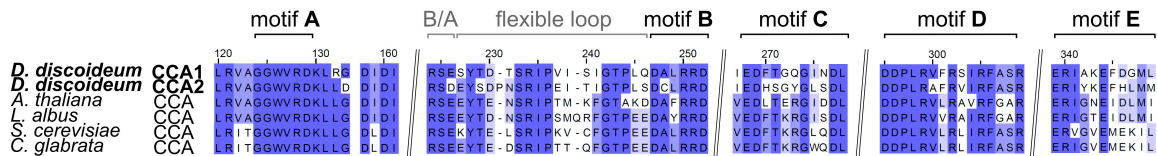

**Figure S3. Sequence alignment of the two *D. discoideum* CCA-adding enzymes with eukaryotic CCA-adding enzymes with known CCA-adding activity.** The two protein sequences of *D. discoideum* CCA-adding enzymes were aligned with protein sequences of the eCCA enzymes of *A. thaliana* (AC: Q94K06), *L. albus* (AC: Q42867), *S. cerevisiae* (AC: P21269) and *C. glabrata* (AC: Q9P4S5) using Clustal Omega [1] with standard parameters. All aligned protein sequences share the same conservation of the core motifs A – E, the basic/acidic motif and the flexible loop element. These motifs characterize the *D. discoideum* CCA-adding enzymes as ancestral eukaryotic type enzyme (eCCA).

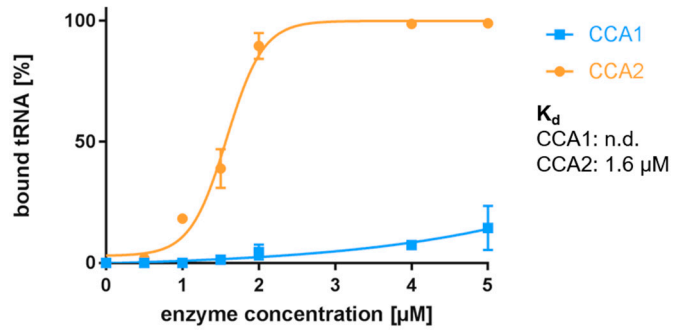

**Figure S4. Interaction of CCA1 and CCA2 with tRNA-CC is not affected by ATP.** Gel shifts were performed after preincubation of enzymes with 1mM ATP $\gamma$ S. While tRNA binding of CCA2 shows no significant difference to the interaction without ATP $\gamma$ S (Fig. 5 in the main text), CCA1 shows almost no interaction, as seen in the absence of ATP $\gamma$ S.

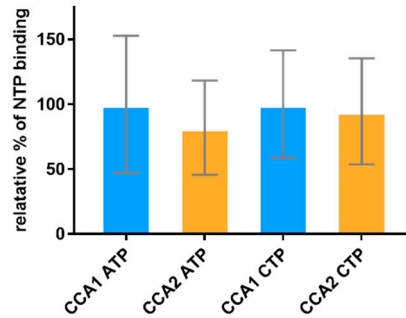

**Figure S5. CTP and ATP binding behavior of CCA1 and CCA2.** Nucleotide binding of CCA1 was set to 100%. The binding behavior of CCA2 is shown relative to CCA2, indicating only marginal deviations. NTP interaction was quantified in a comparative nucleotide binding assay according to Lizano *et al.* [14].

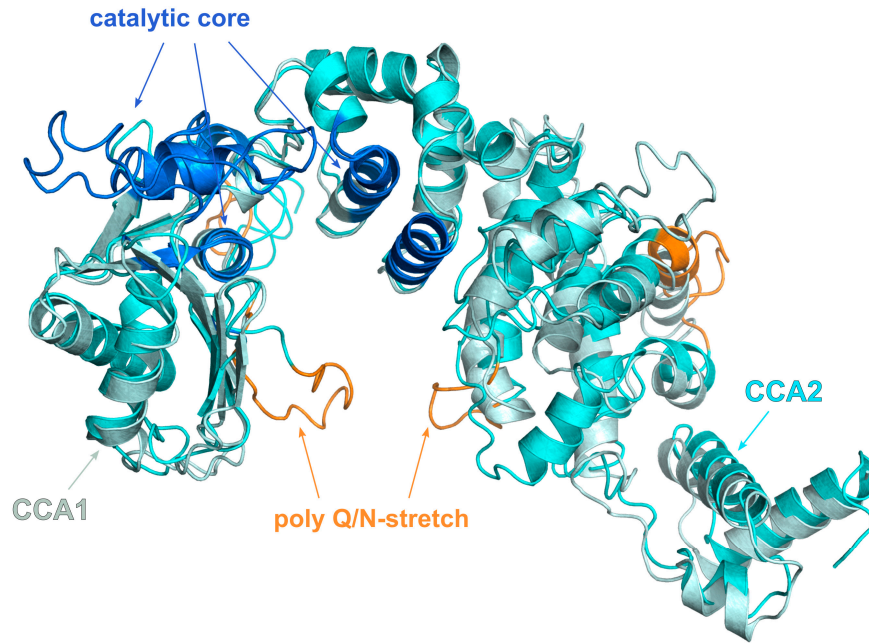

**Figure S6. Structure prediction of the two *D. discoideum* CCA-adding enzymes.** The structures of the CCA-adding enzymes were calculated using iTasser [15]. The core motifs of the two enzymes are colored in blue. The CCA-adding enzyme CCA2 (cyan) harbors several Q/N stretches (orange) that are not found in CCA1 (grey).

**Accession numbers of the protein sequences used in Figure S1:**

|                     | <b>Species</b>                       | <b>Accession number</b> |
|---------------------|--------------------------------------|-------------------------|
| <b>Metazoa</b>      | <i>Caenorhabditis elegans</i>        | Q93795                  |
|                     | <i>Drosophila melanogaster</i>       | AAF51964                |
|                     | <i>Homo sapiens</i>                  | BAB70662                |
|                     | <i>Strongylocentrotus purpuratus</i> | XP_784774.4             |
| <b>Fungi</b>        | <i>Aspergillus nidulans</i>          | KZN89459                |
|                     | <i>Candida glabrata</i>              | Q9P4S5                  |
|                     | <i>Kluyveromyces lactis</i>          | Q6CSU9                  |
|                     | <i>Neoelecta irregularis</i>         | (prosplign)             |
|                     | <i>Neurospora crassa</i>             | Q7SAL9                  |
|                     | <i>Pneumocystis jirovecii</i>        | XP_018230996.1          |
|                     | <i>Pneumocystis carinii</i>          | XP_018225359.1          |
|                     | <i>Pneumocystis murina</i>           | XP_007874977.1          |
|                     | <i>Saccharomyces</i>                 | P21269                  |
|                     | <i>Saitoella complicata</i>          | XP_019025108.1          |
| <b>Plants</b>       | <i>Arabidopsis thaliana</i>          | Q94K06                  |
|                     | <i>Brassica oleracea</i>             | XP_013637841.1          |
|                     | <i>Camelina sativa</i>               | XP_010477526.1          |
|                     | <i>Gossypium hirsutum</i>            | XP_016698247.1          |
|                     | <i>Lupinus albus</i>                 | Q42867                  |
|                     | <i>Manihot esculenta</i>             | XP_021601417.1          |
|                     | <i>Oryza sativa subsp japonica</i>   | Q2QX33                  |
|                     | <i>Tarenaya hassleriana</i>          | XP_010534110.1          |
|                     | <i>Theobroma cacao</i>               | XP_007020008.2          |
|                     | <i>Vitis vinifera</i>                | A7QGJ5                  |
| <b>Entamoeba</b>    | <i>Entamoeba dispar</i> 1            | XP_001739538.1          |
|                     | <i>Entamoeba dispar</i> 2            | XP_001740657.1          |
|                     | <i>Entamoeba histolytica</i> 1       | XP_652076.2             |
|                     | <i>Entamoeba histolytica</i> 2       | XP_654783.1             |
|                     | <i>Entamoeba invadens</i> 1          | XP_004183347.1          |
|                     | <i>Entamoeba invadens</i> 2          | XP_004257247.1          |
|                     | <i>Entamoeba moskovskii</i> 1        | EMO_031410-1            |
|                     | <i>Entamoeba moskovskii</i> 2        | EMO_113580-1            |
|                     | <i>Entamoeba nuttalli</i> 1          | XP_008860114.1          |
|                     | <i>Entamoeba nuttalli</i> 2          | XP_008854811.1          |
| <b>Dictyostelia</b> | <i>Acytostelium subglobosum</i> 1    | XP_012758000.1          |
|                     | <i>Acytostelium subglobosum</i> 2    | XP_012749843.1          |
|                     | <i>Cavenderia fasciculata</i> 1      | XP_004361592.1          |
|                     | <i>Cavenderia fasciculata</i> 2      | XP_004359300.1          |
|                     | <i>Dictyostelium discoideum</i> 1    | DDB_G0293504            |
|                     | <i>Dictyostelium discoideum</i> 2    | DDB_G0271378            |
|                     | <i>Dictyostelium purpureum</i> 1     | XP_003291342.1          |
|                     | <i>Dictyostelium purpureum</i> 2     | XP_003283778.1          |
|                     | <i>Heterostelium album</i> 1         | XP_020429327.1          |
|                     | <i>Heterostelium album</i> 2         | XP_020431701.1          |
|                     | <i>Tieghemostelium lacteum</i> 1     | KYQ91040.1              |
|                     | <i>Tieghemostelium lacteum</i> 2     | KYQ90023.1              |

## Sequences of the Dictyostelia tRNA nucleotidyltransferases used in our analysis

>Acytostelium subglobosum 1

MEHSDKKIKTKHIPITLISNDYKHDNKFHKSCTKTQAQATSTPTLTQQVNTPTPTTPTPDTKCNDEVNMMNNN  
NITNDIDSKNRRRDYVDAAVGNTGETVPLYISETERRLFVLLQVVEKSKCGTTLRVAGGWVRDKLRGDDSSDID  
IALDNLMGFAFASLVNQYLQDHNQETHRIGVIQSNPSQSKHLETATVRI FDMWIDFVNLRSEYTESRIPTIQI  
GTPQEDAFRRDLTINSLFYNNINENKIEDFTGNGINDLMCGIVRTPPLPQTTFLLDDPLRVLR SIRFATRLLYYAIDH  
KLVEAASSPKVKEALKSKVSHERVGIELEGMLSGPRPD LAIHLIHDGLGDFDHI FSLPEGVTI KEKNYRFIATENI  
LNMMRFINWGVANEEVPTKRLRLVSSLLQVFKDYNNTTKKNRQLPLIQHLMVEFLKFSNKDYDDVLNVLECAEKF  
KQHVANLDIKGTF SRKDVGLIMYKAGPLWRTALANSLISELPKYNRNLSYPLHKPELIDGVPSPSSPMHDFHLHS  
HNPHAHHPPLCEASKAIVAKYDNFVASVASHDLIGVWNIKKHLDGKMMEMMLNMKPGKWLAVLQEI FEWQLDNP  
KLDQEHCKQWVLNKFSSLPKQ

>Acytostelium subglobosum 2

MFVLRPGHWHQLQQQHNSIRSI INSSINSI INHRQYTTTTTTTTTRKTKTKTAQTEPRLLVPOQQELDASSAIV  
VSRLSNREKQFFDMFKSVASHYGGNIHLRVSGGWVRDKLLTTTSANPKVDDIDIAIDGITGREFVDLIERYRVE  
KGLSQQKYLIRSNPEKSKHLETA AIKIDGCTFDFTGLRAEDYDQHSRI PKI SAGTLESDAHRRDITINALYFNLN  
TYMVEDYTGKGLDDLRKGI VRTPLEPMITLLEDPLRALRVIRFATRFNFQIHPALYKSLTSSDVRKSLELKVSK  
RIYVEFTSMMSSFKSGAIQYYRYLVGTGLVDAVFPFDSMVKQPVEMIPRHLEKEI ILSLLLLPLYIKYGKSDNIN  
MEQLLMDFKLPKKEIRAVLSIIQSQEI IAKSVSSMLMISPDTLYHPDQFETSLRPLLEWLRHNQYWQAGLWLVSSV  
HFKLKHFSPDFNKDQFWIEFEKLIQNSLEKMANQQYCLDGHEIKDALSIPQEESKPI TNIDE LLIWQWKYNICH  
DKITKDDAKHFVRGLWAQQQLPHQ

>Cavenderia fasciculata 1

MFEGSSSSLSPLSSSSTTIVYNNNHKHLIEKEESQQEFKKRMKTKVIPITQITKDQQSYNPKYYHSVDLEAIDKD  
TKEFYNVVVAIGDKDSTDTATIEITKVEQKLFQILLDVAKVNNCNTTLRVAGGWVRDKLRGDN SHDIDIALDNMM  
GEAFAALVNKYLEDDHHQETHRIGVIQSNPDQSKHLETATVKI FDSWVDLVNLRSEYSSNSRIPEIKIGTPEQDA  
FRDLTINSLFYNNENRIEDFTGNGIVDLKCGIVRTPPLPQTTFLLDDPLRVLR SIRFATRLLYYAIDHKLVEAAS  
NPTVKEALKSKVSHERIGIELDGMLNGPRPD LAIQLIYEFGLFDHVINIPDSIEIQDKEYKYKSI LNVLNMMRFI  
NWGTQAEAEASTRKRLLASLCANIYGYTFKNPLKKNKDTPI LQHVLDVYLKVSNEKCEDEITNVLECAKLFRLVN  
QFYTNHVF SRKSVGLVIYKAGPFWKSSLAIALISELPEFQHNLVYPLHKEEINNSPSHDFYLHLSHPNHHHPPLC  
DESKDIEIKYDQFCATVANHDLVGVWNIKKLLNGKQVMDMLQRKPGEWLTPLLQDVFEWQLDNPQLGEKECKEYV  
LSKFSPK

>Cavenderia fasciculata 2

MYLNRIGSFCINSSKRLNFSTGTITSSSTTSATTSSGSPFFIIPPSSSSTSSSTSSPSEFRKITNPLKSR LN  
ASTIVMQPTTSLIFPMLFKHLSPOLERVGNPYKILDLTADEKYYFNLFRDVL IYFKRQDVQLRVAGGWVRNKL LG  
IQGGTDIDIAIDNLTGHEFVQMIQKYYSINNQILFRNYI IKSNEKSKHLETASLVMKDGLTFDFTLGRSEYDE  
FSRI PNIVKGT LISDSHRDITINSLYNNLMTTRVEDYTLMGLPDLENKI VRTPLSPTLTLCEDPLRALRVLRFS  
NRFSFSIESQLYESLCSDRVRD LGLKVSRRVHTEFTSMMSYKHAIPYFKTLVDTGLIHSIFPTQGLITTTQDW  
YQSLHYLEQSQHVSNI VPDQSIQEFILSSI FLPLKLYQNHLDVFKILLDLKYSKKI CFNVSSTLLSYEILKDP I  
QLITSRPLEHLIDDNQLFEQSVLPLLKWLRHNQLWKNLWTLARLYFYVNHHPVLSRDDQI WIDAQQI IEKEIMPI  
SNTKFCFEARAVMDALGIVNSCDIRPAIDQIMVYQWKNKSTSFSLDHI VKNQFFKIT

>Dictyostelium discoideum 1

MYTRPISKIEKSDQGYDRLYFHKQTNNEKEKLSPMQTSTPTSLKQDPHENIKVSIYYSNERESESVDIRLTECE  
IQLFKELMHVIRDSGCGTTLRVAGGWVRDKLRGDDSN DIDITLDNMMGEAFAELVNKHLSSKHHQTHRIGVIQSN  
PEQSKHLETATVKV FDMWIDFVNLRSESYTDSRI PVISIGTPLQDALRRDLTINSLFFNINENRIEDFTGQGIN  
DLRDGI IRTPLPSLTTFLLDDPLRVFRSIRFASRLNFKIDEELFKAGSDPVVKDAIKSKISHERIAKEFDGMLSAE  
EPYLSIELINKFGLFDCLFSLPTVGLDETYIEQLKNSNKDSEKYCEIADSWIGMGKQYEEIDTKRQLI LSALMIP  
FYGIKFKNANKKNKEMSIIHYMFIEYIKFSNKDYDDVSLILECSEQLMEHI IKFVSAGIFNRKEIGLI IHKSAQL  
WIVVIIISFIKIYQRPNKLQTLFSRYDKPENEKYTI FHKFVGEIKEHDLIGIWNIKRLLNGKQVQD L LNRKPGTW  
LAP  
VIQLILEWQLENPSKTEQDCKDWLLTLDIK

>Dictyostelium discoideum 2

MEILSAFQKTAKIFNNNNNNNSYLLNKL FYSNNSIPTKNIQISPEENKLFDFLKNILIFNNRNDIELRVAGGW  
RDKLLDNQKQQQPQPQPQQQQQIKDIDIDIDIALSNISGTFNFKLIEEFKINKESFKKYLI KRNPEKSKHLET  
ASINIHGFQIDFNSLRSEYSDPNRIPEITIGTPLSDCLRRDLTINSLFYNNLTLKIEDHSGYGLSDLENSIR  
TPLEPLKTLDDPLRAFRVIRFASRFQGFQIEQQLYNTIKFNLNKQLISNKVSKERIYKEFHLMMSNKSSVIQSI

DYLDITGLINSIIDFDKIINDHEI IKELFKKSLKYLKILINQNNNNNDNLFNIDFYKCCIFLPPFIDAHLGFKDN  
TSKTIKSLINYQFSTNTGSTLNISLLFNLISSFLNINNDTNNNTNNNTNINQLKDFKLYLNNLNDKSNLYSIF  
HELKNCKAGGLQWNFPNLSISIVYLLEKYPDRENEILDVLNQLTKLFSDDNFTFEKVSLLVDGRKIKNLFPDQSID  
ITNLMKSMTILQYENPNFKEDDILKWINKNIKDFILKI

>Dictyostelium purpureum 1

MDNVVNSEKLLKNKLAIPITTIKQDHNNYDKCYFHKASSTTENEIDNDYFKINVGDSDNNGEIKSTEIHLTKSEV  
LLFQELMHVVRNSNCGTTLRVAGGWVRDKLRGDDSDNDIDITLDNMMGESFAELVNKHLSGKQHQTHRIGVIQSNP  
EQSKHLETATVKIFDLWIDFVNLRSETYTDNSRIPEIKIGTPLEDSLRRDLTINSLFYNNENKIEDFTGKAITD  
LNLGII RTPLPPLTTFLLDDPLRVFRSIRFASRLYFKIDQELVEAASNAVVEAIKSKISHERIAKEFDGMLGGKR  
PDLAISLIYRFGIYDCLFSLPTSGLDHTKVHTEYREQSIIYCSQAMRLIEWGSQDEELSTKRQRLLSALCIPFYG  
ITYLNANKKNKETSIVIHMIIEYLKLSNKDNDIEISLVLDTAYQIRPHVLKYKEEGPSSFSRKNVGLI IHKCGVLW  
RAALAIALILDLPKYNFNHFNFPPTLCDESNI IINHYNLFCDEI KEQDLIGIWKIKRMLNGKQVQDLLNRKPGEWL  
APVVQSILEWQLENPTLNENDCKKWLETFK

>Dictyostelium purpureum 2

MNQLLNNLKKIKINNLFKKTKKNIDFEKDLNENEKHIIGYLKQVLYQYHNRNDIELRVAGGWVRDKLLNYKNNKLD  
LDFAINNTTGVFVEMIQKYRTEKELKTVYSEYTIKMNPEKSKHLETVSIITIDFTIEFNALRSDFYDENSRIPO  
IQVGTLLSDSLRRDLTINALFYNNINTLMVEDHSGYGLADLENGIIRTPLPFPNTLTEDPLRAFRILRFATKFNFK  
IEPLLYQHIKTINNNI IKKVSKERIYTEFFLMSVREYSEQYFSYLLDTGIINSIFIVNDYIPSSATLEQSVEIW  
KDSLEFIKTSNNLFPNTKEIENLDFYITLIFYPLYKNCKLKKTEIISVLKEFKSPSKLIKQMERSEFEVSELSIL  
ILKYINQLKSSNSNRDQKSLKEFLKEEEQENEIYELIFSIKKYPDWRLSLYLSLVLDLKYRINNNKI IIDGLAVS  
NNSNNNIKLINLLEESLEINSNINDETNI AIKKLINNSNVNGWLN SVLDSFNELFESHCIPLSQVPPFLMDGRELM  
DLFPSIKEKQAKDSRFLNQLIKTTYFYQLKNNIKTKQELINYLKDFL

>Heterostelium album 1

MSEEDQQHNEKRMKTKHIPITLISSSNKHDNQFFHKKPHQSDATTNNTTSTTITTTTTTSDDNLDENNIVYTAIG  
ESGETVPLNITKVEQQLFQTLQVVEQTKCGTVLRVAGGWVRDKLRGDHSSDIDIALDNMMGEAFASLVNQYLKD  
HKQETHRIGVIQSNPAQSKHLETATVRIYDMWIDFVNLRSETYSDHSRIPEITIGTPEQDAYRRDLTINSLFYNI  
NENKIEDFTGNGVDDLKCGIVRTPLPPQTTFLDDPLRVLR SIRFATRYYAIDHKLVEAASSSTVKDALASKVSH  
ERVGIELDGMLSGPRPDLAIHLINHFGLFDHIFSLPEGVTI KEKNYQYIAAENILNMMRFISWGSTTEELPTRKI  
RLLSLLQVFHNYTFTTKNRTIPAIQYTI VEFLKFSNKDYDDVLNVLECADRFKPEVQKLNNDNGSFSRDKVGLI  
VYKAGPLWRVALANALISELPKYNRSIVYFPQRLENPDGSPVPRSPMHD FHLHSHNPHVHHPPLCEDAKKIVSKY  
DNFCASVASHNLVGIWNTKLLDGKQVMELLLKKKPGAWLAPVLQEVFEWQLENPNNSNEEQCKQWVLNKF S

>Heterostelium album 2

MKKNLERARNILLEQKKTISQLQNQNQLLISNQNDIVEVVVLTKTITLNSNKIYNNNNNNNSNHTKSKDDKV  
IVEVSNRIISLNDQEKRYFELFKSVAKHNNLQDKVELRVSGGWVRNKLKLSIDSSSSGYFDIDIAISGITGREFV  
DLIEHYRIEHGLSQKKYLVRNPNPKSKHLETASIVIDGYTFDFTGLRAEQYDTHTRIPQIVDGTPTTDAFRRDIT  
INSLYFNLETYRVEDFTGNGIDDLCKNYIRTPLSPHITLIEDPLRALRVLRFATRFHFNIDPSLYRSIESIEVRS  
ALGYKVSKERIKNEFSLMSSYDSGAIQYFRYLVDTNLVDVVFQSTGSIQITKEDWLLSLNYLEHSLRFKHQLSK  
EMQEDFILGVLMLPLKLYHDALNLEYLLEHFKSSKKQVRTVLSIISPEILINQVIKTLLLPSMTITKESLTQP  
HLFDQITLPLLGWLRNNECWQMGLSISAVHSEIINLPIAHVDKGMN

>Tieghemostelium lacteum 1

MDNNNIKYIPITTIKEGQTFDKDYQKATPDTQSPKDGYYHVNVGVQVVDDELKSATTI RVSEMEKFLQLLMTV  
VRESGCGSTLRVAGGWVRDKLRGDNSHDIDIALDNMMGATFAELVNKHLLEETHQEVHRIGVIQSNPDQSKHLETA  
TVKVYDMWIDFVNLRSETYTEGSRIPITIDIGTPLEDALRRDLTINSLFFNINENLIQDYIGTAIKDLQLGIIRTP  
LPPLTTFLLDDPLRVFRSIRFATRMIFAIDKYLMEASNQVKDAIHTKISHQRIAKEFDGMVTGPRPDLAIHLIQ  
QLGLYQYLFALPPGYNELSKINYIDASCNYINQMMLAHWGENSEELSTKRVRLLSALMIPFHLLTYKNPQNKNR  
IQTLIQYILLDHLKLSNKDYDDVILILDCAKMFPLITQFQTNNTFNRKLVGLAMAKAGVLRASLSIAMVIELP  
DHQFNFTFPMHDSEETPKIFNHHHTHPHHQPMCDQSKNICLLYDQFCATIDTHGLIGCWSIKRLLDGNQVKEIL  
QKAPGSWLAPVIAIFEWQLENPTKTVDQCKEWLIATYK

>Tieghemostelium lacteum 2

MIKHSFKLLCKHIIITPNEQKLFQKLNATVDRDDVTIRIAGGWVRNKLKAMKSEQKEWSIDEENKIDIDIALDNI  
NGSDFVNSIINIEKEPLRSYTVKLNPEKSKHLETASIVIDGYNIDCNGLRSDIYSQDSRIPLITKGTPLSDALRR  
DITINTLFYNIHTQEIEDHTQQGLKDLSECLIRTPPLSPFETLLEDPLRAFRVLR FATKFHFAIEPQLMGV IKSVD  
FRKTVLKKVSRERINTEFNKLMTKPAYALQYFKYLVETGLVEIVYHHTPNPSLPFQNSLPYLELGNSQSVNTKVL  
DTLEFRHSLIFYPMVLDNLLSLTDITKILRDFKSPNKEISQTL SILRLSQVLSTIKSHYTQDTQHTNTSIESYLI

DSPTNFKTHLFPLLLELRKSHQFLLSIHLCRIHSQINDNNNNNNSEQFWDVEALISIKCYPLSKIYSLTQEDV  
FENVEIVKSGKCSGTGFTSLMNELIYHQFSKHNFKSNHIQPIISKQEAIQFLNSLPNK

## References

1. Sievers, F.; Wilm, A.; Dineen, D.; Gibson, T.J.; Karplus, K.; Li, W.; Lopez, R.; McWilliam, H.; Remmert, M.; Söding, J.; et al. Fast, scalable generation of high-quality protein multiple sequence alignments using Clustal Omega. *Mol. Syst. Biol.* **2011**, *7*, 539, doi:10.1038/msb.2011.75.
2. Huson, D.H.; Bryant, D. Application of phylogenetic networks in evolutionary studies. *Mol. Biol. Evol.* **2006**, *23*, 254–267, doi:10.1093/molbev/msj030.
3. Tomita, K.; Weiner, A.M. Collaboration between CC- and A-adding enzymes to build and repair the 3'-terminal CCA of tRNA in *Aquifex aeolicus*. *Science* **2001**, *294*, 1334–1336, doi:10.1126/science.1063816.
4. Bralley, P.; Chang, S.A.; Jones, G.H. A phylogeny of bacterial RNA nucleotidyltransferases: *Bacillus halodurans* contains two tRNA nucleotidyltransferases. *J. Bacteriol.* **2005**, *187*, 5927–5936, doi:10.1128/JB.187.17.5927-5936.2005.
5. Reid, N.E.; Ngou, J.S.; Joyce, P.B.M. *Schizosaccharomyces pombe* contains separate CC- and A-adding tRNA nucleotidyltransferases. *Biochem. Biophys. Res. Commun.* **2019**, *508*, 785–790, doi:10.1016/j.bbrc.2018.11.131.
6. Preston, M.A.; Porter, D.F.; Chen, F.; Buter, N.; Lapointe, C.P.; Keles, S.; Kimble, J.; Wickens, M. Unbiased screen of RNA tailing activities reveals a poly(UG) polymerase. *Nat. Methods* **2019**, *16*, 437–445, doi:10.1038/s41592-019-0370-6.
7. Erber, L.; Franz, P.; Betat, H.; Prohaska, S.J.; Mörl, M. Divergent Evolution of Eukaryotic CC- and A-Adding Enzymes. *IJMS* **2020**, *21*, 462, doi:10.3390/ijms21020462.
8. Shi, H.; Moore, P.B. The crystal structure of yeast phenylalanine tRNA at 1.93 Å resolution: a classic structure revisited. *RNA* **2000**, *6*, 1091–1105, doi:10.1017/s1355838200000364.
9. Oommen, A.; Li, X.Q.; Gegenheimer, P. Cleavage specificity of chloroplast and nuclear tRNA 3'-processing nucleases. *Mol. Cell. Biol.* **1992**, *12*, 865–875, doi:10.1128/mcb.12.2.865.
10. Loria, A.; Pan, T. The 3' substrate determinants for the catalytic efficiency of the *Bacillus subtilis* RNase P holoenzyme suggest autolytic processing of the RNase P RNA in vivo. *RNA* **2000**, *6*, 1413–1422, doi:10.1017/s1355838200000959.
11. Hoffmeier, A.; Betat, H.; Bluschke, A.; Günther, R.; Junghanns, S.; Hofmann, H.-J.; Mörl, M. Unusual evolution of a catalytic core element in CCA-adding enzymes. *Nucleic Acids Res.* **2010**, *38*, 4436–4447, doi:10.1093/nar/gkq176.
12. Tretbar, S.; Neuenfeldt, A.; Betat, H.; Mörl, M. An inhibitory C-terminal region dictates the specificity of A-adding enzymes. *Proc. Natl. Acad. Sci. U. S. A.* **2011**, *108*, 21040–21045, doi:10.1073/pnas.1116117108.
13. Ernst, F.G.M.; Erber, L.; Sammler, J.; Jühling, F.; Betat, H.; Mörl, M. Cold adaptation of tRNA nucleotidyltransferases: A tradeoff in activity, stability and fidelity. *RNA Biol.* **2018**, *15*, 144–155, doi:10.1080/15476286.2017.1391445.
14. Lizano, E.; Schuster, J.; Müller, M.; Kelso, J.; Mörl, M. A splice variant of the human CCA-adding enzyme with modified activity. *Journal of Molecular Biology* **2007**, *366*, 1258–1265, doi:10.1016/j.jmb.2006.12.016.
15. Yang, J.; Zhang, Y. I-TASSER server: new development for protein structure and function predictions. *Nucleic Acids Res.* **2015**, *43*, W174–81, doi:10.1093/nar/gkv342.
